# Supplementary material
Source: HighWire-hosted journal article supplement (https://www.ez-admanager.com/content/suppl/2018/06/27/WNL.0000000000004371)
Supplement: scher_1296.pdf [file scher_1296.pdf]

# Cefalea por abuso de medicación

Una idea arraigada que necesita escrutinio

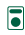

Ann I. Scher, PhD  
Paul B. Rizzoli, MD  
Elizabeth W. Loder, MD,  
MPH

Correspondencia y solicitud de  
separatas al Dr. Scher:  
ann.scher@usuhs.edu

## RESUMEN

Es una idea ampliamente aceptada que las medicaciones tomadas para aliviar el dolor de cabeza agudo paradójicamente empeoran la cefalea si se utilizan demasiado seguido. Este tipo de cefalea secundaria se llama cefalea por abuso de medicación (CAM); términos previamente usados incluían cefalea de rebote y cefalea inducida por fármacos. En ausencia de un consenso sobre la duración del uso, la cantidad y el tipo de medicación requerida para causar CAM, la posición final predeterminada es conservadora. Una recomendación común es limitar el tratamiento a no más de 10 o 15 días por mes (dependiendo del tipo de medicación) para prevenir la progresión de la frecuencia de la cefalea. La retirada de la medicación se recomienda como primer paso en el tratamiento de pacientes con cefaleas muy frecuentes. La evidencia que existe, sin embargo, no aporta bases fuertes para la causalidad propuesta entre el uso de la medicación y la cefalea frecuente. Los estudios observacionales que conectan los patrones de tratamiento con la frecuencia de la cefalea son por naturaleza confundidos por su indicación. Los estudios sobre retirada de medicación han sido en su mayoría no controlados y frecuentemente tienen altas tasas de abandono. La evaluación de esta evidencia sugiere que solo una minoría de los pacientes a quienes se les indica limitar el uso de medicación sintomática se beneficiaría de la limitación en el tratamiento. De forma similar, solo una minoría de los pacientes a quienes se juzga de estar abusando de la medicación se beneficiará de la retirada de esta. Estos hallazgos dan origen a cuestiones serias sobre el valor de ahorrar o retirar medicación sintomática en pacientes con cefaleas frecuentes solamente para prevenir o tratar la CAM. Los beneficios de hacerlo son menores y los daños, mayores de lo que actualmente se reconoce. El concepto de CAM debería ser visto con más escepticismo. Hasta que la evidencia sea mejor, deberíamos evitar el dogmatismo sobre el uso de medicación sintomática. El uso frecuente de las medicaciones para aliviar la cefalea debería ser tomado de forma más neutral, como un indicador de cefaleas pobremente controladas y no invariablemente como su causa. *Neurology*® 2017;89:1296–1304

## GLOSARIO

**CAM** = cefalea por abuso de medicación; **ECV** = enfermedad cardiovascular; **ICHD** = *International Classification of Headache Disorders* (Clasificación Internacional de Cefaleas); **PCORI** = *Patient-Centered Outcomes Research Institute* (Instituto de Investigación de Resultados Centrados en Pacientes).

Datos suplementarios en  
[Neurology.org](http://Neurology.org)

Es ampliamente aceptado que las medicaciones tomadas para aliviar el dolor de cabeza pueden paradójicamente empeorar la cefalea cuando son utilizadas muy seguido. Este concepto de cefalea por abuso de medicación (CAM) está lleno de criterios diagnósticos y extensamente reflejado en guías, recomendaciones de tratamiento y estándares de calidad propuestos para el cuidado en las cefaleas,<sup>1-4</sup> y últimamente diseminado en el público general a través de sitios web orientados a pacientes.<sup>5-8</sup>

En ausencia de un consenso sobre la duración del uso, la cantidad y el tipo de medicación requerida para causar CAM, la posición predeterminada es conservadora. Se cree que la mayoría de las medicaciones para el dolor, que incluyen el acetaminofeno y la aspirina, la causan.<sup>1,2</sup> Muchas autoridades recomiendan que las medicaciones sintomáticas deben ser utilizadas no más de 10 o 15 días/mes dependiendo del tipo de medicación.<sup>1,4</sup>

A veces llamada cefalea de rebote o inducida por fármacos, la actual versión de la Clasificación Internacional de Cefaleas (ICHD, *International Classification of Headache Disorders*) define la CAM como una cefalea que ocurre  $\geq 15$  d/mes en un paciente con una cefalea preexistente que ha excedido regularmente los umbrales específicos de uso de medicación sintomática (tabla 1). Versiones previas requerían que la cefalea se hubiera “desarrollado o empeorado marcadamente” durante el uso excesivo de medicación, y hubiera resuelto o vuelto “a su patrón previo en 2 meses” de interrupción del fármaco.<sup>9</sup> Estos

Del Department of Preventive Medicine and Biostatistics (A.I.S.), Uniformed Services University, Bethesda, MD; and Department of Neurology (P.B.R., E.W.L.), Brigham and Women's Hospital, Boston, MA.

Ir a [Neurology.org](http://Neurology.org) para declaraciones de intereses completas. La información sobre fondos y aquellas declaraciones relevantes para los autores, si existiesen, se encuentran al final del artículo.

**Tabla 1** Subtipos de cefalea por abuso de medicación (CAM) (Clasificación Internacional de Cefaleas -3-beta)<sup>1</sup>

| Subtipo                                                             | Umbral de consumo requerido para diagnóstico de CAM, d/m |
|---------------------------------------------------------------------|----------------------------------------------------------|
| Cefalea por abuso de ergotamina                                     | 10                                                       |
| Cefalea por abuso de triptanes                                      | 10                                                       |
| Cefalea por abuso de analgésicos simples                            | 15                                                       |
| Cefalea por abuso de paracetamol (acetaminofeno)                    |                                                          |
| Cefalea por abuso de ácido acetilsalicílico                         |                                                          |
| Cefalea por abuso de otros fármacos anti-inflamatorios no esteroide |                                                          |
| Cefalea por abuso de opiáceos                                       | 10                                                       |
| Cefalea por abuso de combinación de analgésicos                     | 10                                                       |
| CAM atribuida a fármacos de múltiples clases sin abuso individual   | 10                                                       |
| CAM atribuida a abuso no verificado de fármacos de múltiples clases | 10                                                       |
| CAM atribuida a otra medicación                                     | 10                                                       |

requerimientos se han eliminado presumiendo que la CAM existe si se alcanzan umbrales arbitrarios de frecuencia de cefalea y consumo de medicación, permitiendo adicionalmente el juicio del médico.<sup>1</sup> Los autores del ICHD identifican al abuso de medicación como “la causa más común de síntomas sugestivos de migraña crónica”.<sup>1</sup>

### LOS DEFECTOS DE LA EVIDENCIA EXISTENTE

En este punto de vista, argumentamos que la dominancia establecida de la narrativa de la CAM se basa en un considerable contraste con la fortaleza de la evidencia científica subyacente –evidencia que no alcanza los estándares usualmente aplicados a otros tratamientos de cefalea. Argumentamos que la evidencia no aporta una base fuerte para las causas propuestas sobre el rol del abuso de medicación en las cefaleas que empeoran. Discutimos los daños que resultan de la incorporación de las visiones con poco sustento sobre la CAM en el pensamiento y la práctica clínica, incluyendo la estigmatización y el dolor subtratado. Finalmente, proponemos una reevaluación de este sistema y hacemos recomendaciones para investigaciones futuras.

**La evidencia sobre causa y efecto es débil.** Es inherentemente difícil obtener evidencia de alta calidad que apoye la existencia de la CAM. Un ensayo clínico para un estándar de oro debería asignar de forma aleatoria a individuos con cefaleas episódicas a abusar o no de medicación y comparar las tasas de progresión de la cefalea en los 2 grupos. Dicho estudio no ha sido ni será nunca hecho.

Los estudios observacionales aportan datos relacionados con la historia natural de la frecuencia de la cefalea como también la descripción de factores de riesgo que predicen la mejoría o el empeoramiento de la cefalea. Algunos

de estos estudios han calculado la prevalencia o incidencia de la cefalea o migraña crónicas en individuos que utilizan diferentes tipos de medicación o quienes toman medicación por encima de umbrales críticos.<sup>10-13</sup>

Solo unos pocos estudios son longitudinales, como el realizado por Bigal et al.<sup>10</sup> En este estudio poblacional bien diseñado, se siguieron durante un año individuos con migraña episódica. El resultado de migraña crónica fue comparado entre aquellos que utilizaron tipos particulares de medicación a varios niveles de frecuencia. Las personas con migraña episódica que utilizaron medicación que contenía opiáceos o barbitúricos tuvieron más posibilidad de progresar a una migraña crónica que el grupo de referencia de usuarios de acetaminofeno, luego de hacer un control para sexo, frecuencia y severidad de cefalea, y uso de medicación preventiva. La frecuencia del uso de la medicación por sí sola no estuvo asociada con la incidencia de migraña crónica luego de controlar por frecuencia de cefalea, aunque hubo una relación dosis-dependiente para la frecuencia de uso de barbitúricos. En un análisis separado de remisión basado en la misma población del estudio por Manack et al.<sup>14</sup> el uso de preventivos predijo un peor pronóstico, aunque esta asociación desapareció luego de controlarla para la frecuencia basal de la cefalea. El uso frecuente de medicación, definido como el consumo durante  $\geq 10$  días por mes de medicación prescrita o no, no predijo la remisión ni en los análisis crudos ni en los ajustados.

Los estudios observacionales que muestran una asociación entre la frecuencia o el tipo de medicación utilizada y el empeoramiento de la cefalea pueden aportar información pronóstica útil. No pueden, sin embargo, contestar la pregunta de si los patrones de tratamiento son causa o, alternativamente, una consecuencia de las cefaleas frecuentes –o si la asociación es bidireccional. Argumentamos que las inferencias causales serían amenazadas por confundirse con la indicación, incluso cuando hay control para factores que orientan la preferencia de tratamiento o la ocurrencia de la cefalea (por ej., frecuencia basal de la cefalea o comorbilidades importantes como la depresión).

La confusión por la indicación (y los conceptos relacionados de confusión por severidad o por contraindicación) es un concepto relevante para los estudios observacionales que miden o comparan la eficacia de las diferentes terapias de enfermedad.<sup>15</sup> Como los tratamientos no son asignados aleatoriamente en la práctica, la elección del tratamiento estará en parte basada en factores que pueden estar relacionados con cómo hubiese estado el paciente incluso sin tratamiento. Los factores podrían incluir la severidad de la enfermedad, tratamientos previos fallidos, con-

trindicaciones o comorbilidades, entre otros. Por lo tanto, si los pacientes con enfermedad refractaria tienen más probabilidad de recibir una medicación A de tercera línea, entonces el tratamiento A puede parecer peor que otros tratamientos en los estudios observacionales, aunque podría incluso ser eficaz. Aunque es posible controlar los factores pronósticos o indicaciones conocidas utilizando varias estrategias de ajuste, como pareamiento por puntaje de propensión,<sup>16-18</sup> la efectividad del control estadístico siempre depende de cuán bien entendido (y cuán bien medido) estén estos otros factores.<sup>15</sup> En este ejemplo, la indicación (por ej., enfermedad refractaria) puede tener una influencia mucho mayor en el éxito del tratamiento que el tratamiento mismo, por lo tanto es críticamente importante que la estrategia analítica elegida separe efectivamente el efecto del tratamiento del efecto de la indicación del tratamiento. Ejemplos relevantes de resultados de estudios observacionales que pueden ser en parte debidos a la confusión por la indicación, incluyen el hallazgo de que los migrañosos, que utilizan medicación preventiva para la migraña, tienen peor pronóstico que aquellos que no la reciben,<sup>12,14</sup> y la falta de incremento en el riesgo de enfermedad cardiovascular (ECV) incidental en migrañosos que recibieron triptanes en comparación con aquellos que no.<sup>19,20</sup> La confusión sería positiva en el primer ejemplo, ya que la indicación de preventivos (cefaleas frecuentes) es por sí misma un factor de riesgo fuerte para la progresión de la cefalea. La confusión sería negativa en el segundo ejemplo, ya que el uso de triptanes está contraindicado en pacientes con factores de riesgo de ECV y, por lo tanto, los pacientes a quienes su médico les prescribe triptanes deberían tener menor riesgo de ECV que otros migrañosos.

El concepto de confusión por indicación en estudios de CAM puede ser ilustrado por un simple experimento mental. Supongamos que los es-

tudios de Bigal et al.<sup>10</sup>/Manack et al.<sup>14</sup> o estudios observacionales similares hubiesen sido hechos en pacientes con asma, y se hubiese observado que los pacientes que utilizaban medicación sintomática frecuentemente tenían peor pronóstico que otros, incluso después de realizar ajustes para todas las variables pronósticas conocidas. ¿Sería este nivel de evidencia suficiente para recomendar que los pacientes limiten el uso de estas medicaciones? ¿No es una interpretación más plausible que el abuso de la medicación es simplemente un indicador de un asma pobremente controlada y no la causa de esta?<sup>21</sup> Un número de estudios han identificado comorbilidades y biomarcadores que están asociados con el abuso de medicación, e incluyen los polimorfismos genéticos, como también anomalías electrofisiológicas y de neuroimagen. Como con el abuso de medicación en sí misma, sin embargo, todas estas cosas pueden simplemente ser marcadores de condiciones severas o pobremente controladas de la cefalea.<sup>22</sup>

Notamos que muchas personas con cefaleas frecuentes no están abusando de medicación (tabla 2), y que el abuso de medicación no produce invariablemente CAM.<sup>10</sup> Los autores de una revisión sistemática reciente identificaron 18 estudios poblacionales que reportaron la prevalencia del abuso de medicación entre personas con cefalea muy frecuente.<sup>34</sup> La prevalencia estimada basada en datos crudos y sin ajustar va de 11% a 68%. Esto ilustra la incertidumbre sustancial sobre la magnitud del problema. También sugiere que incluso si el abuso de medicación produce un empeoramiento de la cefalea en algunas personas, no es la única y posiblemente no sea ni siquiera la causa más frecuente de cefalea crónica. La tabla 2 muestra una lista de un subgrupo de estos estudios.

Finalmente, la evidencia sobre la asociación entre tipos específicos de medicación sintomática y el aumento en la frecuencia de cefalea es inconsistente. La evidencia de que los analgésicos simples podrían producir CAM es especialmente débil. Los criterios de la ICHD permiten hacer un diagnóstico de CAM en personas con cefalea frecuente que usan analgésicos simples como la aspirina o el ibuprofeno, 15 o más días al mes. Sin embargo, en un estudio observacional, los pacientes con cefalea que reportaron el uso regular de aspirina o ibuprofeno tuvieron un riesgo reducido de progresión de la cefalea.<sup>29</sup> Esto puede ser un ejemplo de confusión por indicación o causalidad inversa, ya que los pacientes con cefaleas muy frecuentes pueden evitar estas medicaciones debido a los efectos colaterales. Sin embargo, la evidencia de 2 ensayos aleatorizados controlados con placebo de aspirina diaria mostró mejoría más que empeoramiento en los migrañosos que fueron asigna-

**Tabla 2** Estudios poblacionales seleccionados que examinan la proporción de individuos con cefalea crónica diaria ( $\geq 15$  cefaleas d/m) que abusan de medicación

| Estudio                        | Rango de edad, años | Proporción que abusa de medicación <sup>a</sup> |
|--------------------------------|---------------------|-------------------------------------------------|
| Castillo et al. <sup>23</sup>  | 14 y mayores        | 28                                              |
| Dyb et al. <sup>24</sup>       | 13-18               | 36                                              |
| Katsarava et al. <sup>25</sup> | 16 y mayores        | 11                                              |
| Lu et al. <sup>26</sup>        | 15 y mayores        | 34                                              |
| Lundqvist et al. <sup>27</sup> | 30-44               | 46                                              |
| Prencipe et al. <sup>28</sup>  | 65 y mayores        | 38                                              |
| Scher et al. <sup>29</sup>     | 18-65               | 23                                              |
| Wang et al. <sup>30</sup>      | 65 y mayores        | 25                                              |
| Wang et al. <sup>31</sup>      | 12-14               | 20                                              |
| Wiendels et al. <sup>32</sup>  | 25-55               | 63                                              |
| Zwart et al. <sup>33</sup>     | 20 y mayores        | 45                                              |

<sup>a</sup>Basado en varias definiciones. Algunas figuras han sido estimadas de la publicación indicada.

dos al grupo aspirina.<sup>35,36</sup> Una guía del 2012 de la *American Academy of Neurology* y la *American Headache Society* concluyó que varios fármacos antiinflamatorios no esteroideos, que incluyen el ibuprofeno, el naproxeno y el ketoprofeno, son “probablemente efectivos y deberían ser considerados en la prevención de la migraña.”<sup>37</sup> Es difícil reconciliar esta evidencia con la creencia general e que el uso regular de estas medicaciones empeora la cefalea.

Cuatro estudios interesantes han considerado si la CAM sucede cuando las medicaciones para el dolor son utilizadas para otras condiciones. Las poblaciones evaluadas fueron pacientes post-colectomía,<sup>38</sup> pacientes reumatológicos<sup>39,40</sup> y pacientes con enfermedad degenerativa musculoesquelética.<sup>41</sup> Dos estudios<sup>40,41</sup> concluyeron que no había asociación entre el uso regular o frecuente de medicación para el dolor no cefaleico y el desarrollo de cefalea crónica. Los otros 2 estudios<sup>38,39</sup> concluyeron que el uso frecuente de analgésicos para dolor no cefaleico estuvo asociado con el desarrollo de migraña crónica solo en aquellos con una historia preexistente de migraña. Los 4 estudios son pequeños y tienen importantes limitaciones que no apoyan conclusiones fuertes.

**La retirada de la medicación no ayuda a la mayoría de los pacientes con cefaleas frecuentes.** Otra línea de evidencia que apoya la existencia de CAM, se relaciona con el tratamiento retirando medicación (a veces referido como desintoxicación). Si la CAM es reversible, entonces la retirada de las medicaciones abusadas (solamente) debería mejorar la frecuencia de la cefalea, aunque la evidencia de que esto sea así es débil. A pesar de esto, los autores del ICHD-3-beta dicen que “la mayoría” de los pacientes con cefaleas frecuentes que cumplen criterios de CAM mejorarán con la retirada.

Una revisión sistemática de estrategias de tratamiento para la CAM evaluó la retirada por sí sola o con otras estrategias preventivas. Los autores de la revisión concluyeron: “El nivel de evidencia para apoyar solo la discontinuación temprana de las medicaciones abusadas es bajo debido a la ausencia de estudios controlados.”<sup>42</sup> Ellos recomiendan, en cambio, la adición de terapia preventiva a los regímenes de pacientes con cefalea muy frecuente y presunta CAM.

Los 4 estudios de solo-retirada identificados en esta revisión están en la lista de la tabla 3, junto con 2 estudios relevantes publicados después del rango de fechas que abarca la revisión.<sup>43-48</sup> Los 6 estudios utilizaron una variedad de estrategias de retirada que van desde el simple consejo de reducir el consumo de medicación hasta la internación para retirarla. Solo un estudio tuvo un grupo control sin tratamiento y ninguno fue ciego. El éxito, usualmente definido como > 50% de mejoría en la frecuencia de cefalea, fue de ≤ 33% en 5 de los 6 estudios en el período de seguimiento de 2-3 meses, utilizando el análisis de intención-de-tratar.

Los análisis de intención-de-tratar son particularmente importantes en la evaluación de estos estudios. Algunos estudios muestran tasas de éxito para aquellos pacientes que completan la retirada del fármaco, pero esto puede ser mal interpretado porque muchos pacientes que no pueden o no quieren suspender el tratamiento no son un subgrupo aleatorio de participantes. La exclusión de estos cuando los resultados son calculados infla el éxito estimado del tratamiento, porque aquellos que permanecen con el tratamiento tienen supuestamente más probabilidades de ser respondedores al placebo o hubieran mejorado de todas maneras. La mejoría en los pacientes que pueden tolerar la retirada se interpreta entonces de forma errónea

**Tabla 3** Proporción de pacientes con cefalea por abuso de medicación presunta que mejoraron con la retirada de la medicación como único tratamiento

| Estudio, año/no. de pacientes                                                            | Duración del seguimiento, meses <sup>a</sup> | Proporción que cumplió con la retirada <sup>a</sup> | Proporción de cumplidores que mejoraron | Proporción del total de pacientes que mejoraron <sup>a</sup> | Definición de mejoría para el estudio                               |
|------------------------------------------------------------------------------------------|----------------------------------------------|-----------------------------------------------------|-----------------------------------------|--------------------------------------------------------------|---------------------------------------------------------------------|
| <b>Estudios identificados en la revisión de Chiang et al.<sup>42</sup></b>               |                                              |                                                     |                                         |                                                              |                                                                     |
| Grande et al., <sup>43</sup> 2011/n = 140                                                | 18                                           | Desconocida                                         | 42                                      | 33                                                           | < 15 cefaleas d/m                                                   |
| Hagen et al., <sup>44</sup> 2009/n = 20                                                  | 3                                            | 91                                                  |                                         | 15 (intención de tratar)                                     | ≥ 50% de reducción en los días de cefalea y sin abuso de medicación |
| Rossi et al., <sup>45</sup> 2011/n = 100                                                 | 2                                            | 79                                                  | 87                                      | 69                                                           | ≥ 50% de reducción en los días de cefalea                           |
| Zeeberg et al., <sup>46</sup> 2006/n = 337                                               | 2                                            | 64                                                  | 45                                      | 29                                                           | ≥ 1% de reducción en los días de cefalea                            |
| <b>Estudios relevantes publicados luego de la revisión de Chiang et al.<sup>42</sup></b> |                                              |                                                     |                                         |                                                              |                                                                     |
| Sarchielli et al., <sup>47</sup> 2014/n = 44                                             | 3                                            | 100                                                 | 24                                      | 24 (Retirada + grupo placebo)                                | ≥ 50% de reducción en los días de cefalea                           |
| Pijpers et al., <sup>48</sup> 2016/n = 416                                               | 2-3                                          | 68                                                  | 42                                      | 27                                                           | ≥ 50% de reducción en los días de cefalea                           |

<sup>a</sup>Calculado o estimado de la publicación original en algunos casos. Ver las notas del apéndice e-1 para detalles de extracción o cálculo de datos

**Tabla 4 Remisión de la cefalea por abuso de medicación en la rama placebo de ensayos controlados aleatorizados de tratamientos preventivos**

| Estudio (tratamiento)                                | No. (placebo) | Población | Seguimiento, sem | Tasa de respuesta, % | Resultado                                 |
|------------------------------------------------------|---------------|-----------|------------------|----------------------|-------------------------------------------|
| Silberstein et al. <sup>51</sup> (toxina botulínica) | 459           | MC + AM   | 24               | 32                   | > 50% de reducción en los días de cefalea |
| Sandrini et al. <sup>52</sup> (toxina botulínica)    | 35            | MC + AM   | 12               | 30 <sup>a</sup>      | > 50% de reducción en los días de cefalea |
| Diener et al. <sup>53</sup> (topiramato)             | 23            | MC + AM   | 4                | 0                    | > 50% de reducción en los días de cefalea |
| Silvestrini et al. <sup>54</sup> (topiramato)        | 14            | MC + AM   | 8                | 0                    | > 50% de reducción en los días de cefalea |

Abreviaturas: MC + AM = migraña crónica con abuso de medicación

<sup>a</sup>Estimado.

como evidencia de que la retirada de la medicación fue efectiva. Volviendo a la analogía del asma, esto es equivalente a conducir un ensayo intervencionista no controlado en pacientes asmáticos que pueden tolerar estar sin recate con inhaladores durante 2-3 meses, y luego extrapolar los resultados a todos los pacientes con asma. Las razones para la no participación en los 6 estudios se describen en el apéndice e-1 en Neurology.org y el lector puede evaluar hasta qué punto la exclusión de los que abandonaron/no completaron el estudio puede llevar a una sobreestimación de la efectividad del tratamiento. Nuestro análisis de intención-de-tratar en la tabla 3 usa la interpretación más conservadora, que es que aquellos que no retiraron la medicación con éxito o se perdieron en el seguimiento fueron fallas del tratamiento.

Dado que la mayoría de los estudios descriptos en la tabla 3 no tuvieron grupo control, nos queda preguntarnos si una tasa de respuesta ~33% es mayor que el porcentaje de pacientes que podrían haber mejorado debido a la historia natural de la enfermedad, la regresión a la media o efectos placebo no específicos. Algunas claves pueden ser sacadas de estudios sobre historia natural y ensayos controlados contra placebo. La frecuencia de cefalea es altamente variable cuando se evalúa a través de múltiples puntos en el tiempo y una proporción sustancial de personas con cefaleas de alta frecuencia, probablemente la mayoría en la población general al menos, en algún momento de las entrevistas de seguimiento, bajará el umbral arbitrario de 15 días de cefalea al mes.<sup>14,30,31,49,50</sup>

Uno también puede observar las tasas de respuesta en las ramas placebo en 4 ensayos controlados aleatorizados para migraña crónica que

reportaron resultados para el subgrupo de abuso de medicación (tabla 4).<sup>51-54</sup> En estos ensayos, la proporción de pacientes con CAM en la rama placebo que experimentó una reducción mayor al 50% en los días de cefalea a lo largo del ensayo fue del 0% en 2 pequeños (sobre la base del tamaño del subgrupo con CAM) estudios con topiramato, al 30-32% en los ensayos con toxina botulínica A. En el agregado, estos estudios poblacionales y clínicos ilustran el considerable desconocimiento sobre el curso de la cefalea de alta frecuencia y subraya la necesidad crítica de ensayos controlados rigurosos antes de poder recomendar la retirada de la medicación como un tratamiento efectivo.

### DAÑOS E IMPLICANCIAS DE UN DIAGNÓSTICO O TRATAMIENTO DE CAM

Los daños de diagnosticar o tratar una CAM no han sido bien estudiados, pero merecen consideración. Estos incluyen (1) sufrimiento innecesario, (2) culpa y estigmatización y (3) dispersión de la investigación y la atención clínica.

**Sufrimiento.** En el caso de un paciente con cefaleas diarias –un escenario nada raro en la especialidad de cefaleas– los criterios del ICHD-3-beta sugieren que, dependiendo del tipo de medicación, debe sospecharse una CAM en los pacientes que tratan un tercio o la mitad de los ataques. La limitación del tratamiento de los ataques agudos por debajo de este nivel supuestamente protege a los pacientes de una progresión de la frecuencia de cefalea, aunque no hay ninguna evidencia que apoye esta idea. De hecho, es posible que, para la mayoría de los pacientes con cefalea frecuente, la limitación estricta de la medicación produzca un daño por

**Tabla 5 Número necesario para subtratar para evitar un caso de migraña crónica incidental (transformada) (luego de Bigal et al.<sup>10</sup>)**

| Tipo de medicación          | Cefalea, d/m | Incidencia en 1 año de migraña crónica en no expuestos, % | Incidencia en 1 año de migraña crónica en expuestos, <sup>a</sup> % | No. necesario subtratar para evitar un caso |
|-----------------------------|--------------|-----------------------------------------------------------|---------------------------------------------------------------------|---------------------------------------------|
| Medicación con barbitúricos | 10-14        | 2,5                                                       | 32                                                                  | 3,4                                         |
| Opiáceos                    | 10-14        | 2,5                                                       | 24                                                                  | 4,7                                         |

<sup>a</sup>La incidencia de migraña crónica en un año en un grupo utilizando la medicación indicada durante 10 días al mes, estimado de la figura 3 del estudio observacional de Bigal et al.<sup>10</sup> de la transición de la migraña episódica a la migraña crónica como una función de frecuencia de tratamiento, tipo de tratamiento y frecuencia de la cefalea. Asume causalidad y que la incidencia de la migraña crónica en el grupo no expuesto es 2,5%, por ej., la tasa de incidencia total de migraña crónica en la población.

subtratar el dolor y no resulte en un beneficio en términos de reducir la frecuencia. La tabla 5 muestra el número hipotético de pacientes con migraña que tendrían que limitar el tratamiento sintomático para evitar un caso de migraña crónica incidental, sobre la base de los riesgos estimados del estudio observacional de Bigal et al.<sup>10</sup> Asumiendo una causalidad (o sea, asumir que el pronóstico de la cefalea estuvo solamente relacionada con los patrones de tratamiento más que por confundidores no medidos o su historia natural), el número hipotético que se necesita subtratar va de 3,4 a 4,7 para el grupo de cefalea de alta frecuencia.

Retirar la medicación también involucra un pobre balance costo-beneficio, especialmente porque la evidencia sugiere que el tratamiento preventivo para reducir la frecuencia de la cefalea puede de hecho ser efectivo incluso si las medicaciones sintomáticas no son retiradas.<sup>44,55</sup> Más aún, muchos pacientes que suspendieron la medicación no completaron el tratamiento, pero aún así tienen que soportar largos períodos sin un alivio efectivo del dolor. En el mayor estudio con este enfoque (tabla 3), se les decía a los pacientes que no les ofrecerían tratamiento específico para la cefalea salvo que fuesen capaces de estar sin medicación sintomática incluyendo cafeína durante 2-3 meses.<sup>48</sup> El análisis de intención de tratar (incluyendo el tercio aproximado de pacientes que no pudieron o no quisieron completar la retirada) mostró una respuesta al tratamiento de solo el 27%, definida como > 50% de reducción en la frecuencia de la cefalea.

Se vieron resultados muy similares en el segundo estudio más grande, con aproximadamente un tercio de los pacientes sin completar la retirada y con una respuesta de la intención de tratar del 29%, definida en este estudio como > 0% de reducción en la frecuencia de cefalea.<sup>46</sup> Esto corresponde a un número necesario para subtratar de aproximadamente 3. Puesto de otra manera, como mínimo 3 pacientes tienen que sufrir meses de dolor sin tratar para que uno sea ayudado –esto asumiendo que toda la mejoría fue debido a la retirada de la medicación *per se* y que ninguno mejoró debido a la historia natural, regresión a la media o respuesta al placebo.

**Culpa y estigmatización.** Los pacientes pueden sufrir si son vistos como arquitectos de su propia cefalea. Los cuidadores pueden creer que no merecen ayuda o, como describe el estudio anterior, incluso no dar otros tratamientos hasta que los pacientes completen el programa de retirada de la medicación. Los pacientes pueden experimentar una sensación de fracaso si no son capaces de limitar el uso de la medicación o pueden de hecho ocultar el uso de la medicación de su doctor.

El estigma asociado con las percepciones del abuso de medicación solo agrega sentido de culpa experimentado en aquellos con cefaleas crónicas, que ya “se preocupan por lo que van a pensar sus doctores de ellos si se quejan o fallan en sus tratamientos.”<sup>56</sup> Más aún, esta carga de culpa no está distribuida uniformemente: los pacientes con formas de cefalea más severa, inusual o intratable estarán afectados por una visión inflexible de abuso de medicación como una causa de la cefalea crónica o refractaria.

**Desviación de la atención.** Un daño menos aparente, pero igualmente importante, es la desviación del tiempo, la atención y los recursos fuera de las actividades que beneficiarían a los pacientes más que la limitación o la retirada de la medicación. Los médicos pueden estar más interesados en limitar o reducir la medicación sintomática que en investigar explicaciones alternativas o tratamientos para las cefaleas crónicas basados en evidencia. Presionados para recomendar algún tipo de tratamiento, podrían sugerir tratamientos costosos, invasivos o sin evidencia de calidad o de que tengan beneficio. Estas opciones pueden actualmente aumentar los costos y producir peores resultados. Los investigadores pueden ser disuadidos de estudiar otras causas de la progresión de la cefalea, o encontrarse con dificultades para conseguir dinero de los financiadores que creen fuertemente en la explicación de CAM. Estos costos de oportunidad son un argumento importante contra las generalizaciones demasiado amplias sobre la conexión entre el uso de medicación y las cefaleas frecuentes.

**LA NECESIDAD DE UNA REEVALUACIÓN** La CAM es una creencia arraigada que ha ganado veracidad y aceptación a través de la repetición.<sup>57</sup> ¿Por qué el concepto de CAM ha sido tan popular y duradero a pesar de la debilidad de la evidencia científica que apoya su existencia? ¿Por qué la evidencia que apoya el tratamiento de la CAM no es evaluada tan críticamente como la evidencia de otras intervenciones, como por ejemplo el cierre del foramen oval permeable persistente u otros tratamientos quirúrgicos?<sup>58-60</sup>

Hay varias explicaciones posibles para su atractivo. En primer lugar, la idea de CAM se alinea con la experiencia clínica de los médicos tratantes: los pacientes que toman mucha medicación tienden a ser aquellos que evolucionan mal y cuyas cefaleas no responden bien al tratamiento. En segundo lugar, la CAM da una explicación conveniente para la falla de tratamiento –aunque lo hace culpando al paciente por abusar de la medicación, y no a los tratamientos existentes por no ser adecuados.

Finalmente, hay muchas buenas razones además del miedo a la CAM para evitar el uso excesivo de medicación sintomática. La CAM aporta una explicación a los médicos para evitar prescribir medicaciones como los opiáceos o los barbitúricos que (por muchas buenas razones) no quieren utilizar. Las medicaciones que contienen opiáceos y barbitúricos alteran la atención y están asociadas con riesgo de adicción o síndrome de dependencia; las medicaciones anti-inflamatorias no esteroideas pueden producir sangrado gastrointestinal o daño renal, por ejemplo. No estamos sugiriendo que sea deseable el uso frecuente de medicación sintomática. Nuestro punto es más estrecho aún, y es que el daño específico de la CAM ha sido exagerado.

La narrativa de la CAM también ignora lo que sabemos sobre los otros factores de riesgo potenciales o fenómenos biológicos. ¿Cómo puede ser posible que la exposición por encima de un umbral arbitrario de consumo de medicación pueda producir una cefalea crónica en la mayoría de los pacientes? La complejidad de la interacción entre la susceptibilidad individual, la farmacología de las diferentes medicaciones y las diversas causas subyacentes de cefalea sugieren que es una sobre simplificación. Si la CAM es real, es más posible que exista un espectro de susceptibilidad, de manera que no todo el mundo expuesto desarrolle el problema y que otros factores deben estar involucrados.

**DIRECCIONES FUTURAS** Se necesita mejor evidencia. Un desarrollo esperanzador es el reciente anuncio del *Patient-Centered Outcomes Research Institute* (PCORI) que financiará un ensayo pragmático grande que compara 2 estrategias de tratamiento para pacientes con migraña crónica que están destinados a abusar de medicaciones para tratar los ataques de cefalea. El estudio comparará la discontinuación temprana de la medicación abusada junto con profilaxis de la migraña con una estrategia de profilaxis de la migraña sin suspender de forma temprana la medicación abusada.<sup>61</sup> En consistencia con las prioridades de investigación de PCORI (por ej., efectividad comparada de terapias existentes), el estudio no incluye un grupo control, por lo que no podrá demostrar hasta qué punto cada estrategia es preferible a mantener el estado previo.

Mientras que la evidencia en esta área es inherentemente difícil de conseguir, hay algunas consideraciones metodológicas que podrían mejorar la calidad de la investigación. Como se mencionó previamente, es esencial que los estudios de retirada de medicación incluyan a los que abandonan en el análisis de acuerdo con la metodología estándar. Otro obstáculo para la investigación en esta área ha sido el uso de puntos de corte arbitrarios para definir la cefalea cróni-

ca y el abuso de medicación.<sup>62</sup> Como se describió previamente, el uso de tales puntos de corte resulta en estimados espúreos de “remisión” e “incidencia”, que pueden ser sustancialmente dependientes del alcance de la variabilidad natural o error de medición.<sup>63</sup> Mientras que a esta fuente de error se le puede sacar el sesgo, es importante considerarla al interpretar estudios intervencionistas no controlados (que pueden tener una tasa de respuesta artificialmente alta) o estudios observacionales (en los cuales el verdadero efecto de los factores de riesgo puede ser oscurecido). Un número de investigadores en cefalea han considerado estos y otros problemas en detalle y han hecho sugerencias para mejorar el rigor y la utilidad de los estudios observacionales e intervencionistas en investigación de la cefalea crónica, incluyendo la CAM.<sup>62-67</sup>

El concepto de CAM ha sido tomado de forma demasiado entusiasta y debería ser visto con más escepticismo. Hasta que la evidencia sea mejor, deberíamos evitar el dogmatismo. No es intelectualmente honesto, o justo para los pacientes, pretender que el rigor de la evidencia es fuerte. En cambio, el uso frecuente de medicación sintomática para la cefalea debería ser visto con más neutralidad, como marcador de un pobre control de la cefalea. Esto, en cambio, puede reflejar la severidad de la enfermedad, las limitaciones de las terapias actuales, los efectos sociales o económicos, o la complejidad del juego entre estos factores. No todos estos pueden ser intervenidos. Mientras tanto, los pacientes y los médicos deberían reconocer que todavía no podemos contestar con certeza a la pregunta “¿Cuánta medicación es mucha medicación?”

**DECLARACIÓN** Las visiones expresadas en este artículo son las de los autores y no necesariamente reflejan la política oficial de los *Uniformed Services University of the Health Sciences*, el *Department of Defense*, o el *US Government*.

### CONTRIBUCIONES DE LOS AUTORES

Ann Scher: concepto y diseño del estudio, análisis e interpretación de datos, aprobación de la versión final. Elizabeth Loder: concepto y diseño del estudio, revisión crítica del manuscrito para contenido intelectual importante, aprobación de la versión final. Paul Rizzoli: revisión crítica del manuscrito para contenido intelectual importante, aprobación de la versión final.

### FONDOS PARA EL ESTUDIO

No se reportan fondos.

### DECLARACIÓN DE INTERESES

A. Scher: consultor/miembro de comité para Allergan. P. Rizzoli y E. Loder no tienen nada para reportar relevante al manuscrito. Ir a [Neurology.org](http://Neurology.org) para declaraciones completas.

## BIBLIOGRAFÍA

1. Headache Classification Committee of the International Headache Society (IHS). The International Classification of Headache Disorders, 3rd edition (beta version). *Cephalalgia* 2013;33:629–808.
2. Evers S, Jensen R. Treatment of medication overuse headache: guideline of the EFNS headache panel. *Eur J Neurol* 2011;18:1115–1121.
3. Ross S, Wall E, Schierman B, et al. Quality improvement in neurology: primary headache quality measures. *Neurology* 2015;84:200–203.
4. Loder E, Weizenbaum E, Frishberg B, Silberstein S. Choosing wisely in headache medicine: the American Headache Society's list of five things physicians and Patients should question. *Headache* 2013;53:1651–1659.
5. Medication-overuse headache [online]. Available at: [migrainetrust.org/about-migraine/types-of-migraine/otherheadache-disorders/medication-overuse-headache](http://migrainetrust.org/about-migraine/types-of-migraine/otherheadache-disorders/medication-overuse-headache). Accessed August 1, 2017.
6. Medication overuse headache [online]. Available at: [americanmigraine.foundation.org/medication-overuse-headache](http://americanmigraine.foundation.org/medication-overuse-headache). Accessed August 1, 2017.
7. Rebound headaches [online]. Available at: [patientslikeme.com/symptoms/show/2023](http://patientslikeme.com/symptoms/show/2023). Accessed August 1, 2017.
8. Away with rebound headache! [online]. Available at: [relieve-migraine-headache.com/rebound-headache.html](http://relieve-migraine-headache.com/rebound-headache.html). Accessed August 1, 2017.
9. Headache Classification Committee of the International Headache Society (IHS). The International Classification of Headache Disorders: 2nd edition. *Cephalalgia* 2004;24 (suppl 1):9–160.
10. Bigal ME, Serrano D, Buse D, Scher A, Stewart WF, Lipton RB. Acute migraine medications and evolution from episodic to chronic migraine: a longitudinal population-based study. *Headache* 2008;48:1157–1168.
11. Lipton RB, Serrano D, Nicholson RA, Buse DC, Runken MC, Reed ML. Impact of NSAID and triptan use on developing chronic migraine: results from the American Migraine Prevalence and Prevention (AMPP) study. *Headache* 2013;53:1548–1563.
12. Katsarava Z, Schneeweiss S, Kurth T, et al. Incidence and predictors for chronicity of headache in patients with episodic migraine. *Neurology* 2004;62:788–790.
13. Zwart JA, Dyb G, Hagen K, Svebak S, Holmen J. Analgesic use: a predictor of chronic pain and medication overuse headache: the Head-HUNT Study. *Neurology* 2003;61:160.
14. Manack A, Buse DC, Serrano D, Turkel CC, Lipton RB. Rates, predictors, and consequences of remission from chronic migraine to episodic migraine. *Neurology* 2011;76:711–718.
15. Joseph KS, Mehrabadi A, Lisonkova S. Confounding by indication and related concepts. *Curr Epidemiol Rep* 2014;1:1–8.
16. Andrade C. Propensity score matching in nonrandomized studies: a concept simply explained using antidepressant treatment during pregnancy as an example. *J Clin Psychiatry* 2017;78:e162–e165.
17. Kyriacou DN, Lewis RJ. Confounding by indication in clinical research. *JAMA* 2016;316:1818–1819.
18. Sturmer T, Joshi M, Glynn RJ, Avorn J, Rothman KJ, Schneeweiss S. A review of the application of propensity score methods yielded increasing use, advantages in specific settings, but not substantially different estimates compared with conventional multivariable methods. *J Clin Epidemiol* 2006;59:437–447.
19. Hall GC, Brown MM, Mo J, MacRae KD. Triptans in migraine: the risks of stroke, cardiovascular disease, and death in practice. *Neurology* 2004;62:563–568.
20. Velentgas P, Cole JA, Mo J, Sikes CR, Walker AM. Severe vascular events in migraine patients. *Headache* 2004;44:642–651.
21. Slejko JF, Ghushchyan VH, Sucher B, et al. Asthma control in the United States, 2008–2010: indicators of poor asthma control. *J Allergy Clin Immunol* 2014;133:1579–1587.
22. Diener HC, Holle D, Solbach K, Gaul C. Medication-overuse headache: risk factors, pathophysiology and management. *Nat Rev Neurol* 2016;12:575–583.
23. Castillo J, Munoz P, Guitera V, Pascual J. Kaplan Award 1998: epidemiology of chronic daily headache in the general population. *Headache* 1999;39:190–196.
24. Dyb G, Holmen TL, Zwart JA. Analgesic overuse among adolescents with headache: the Head-HUNT-Youth Study. *Neurology* 2006;66:198–201.
25. Katsarava Z, Dzagnidze A, Kukava M, et al. Primary headache disorders in the Republic of Georgia: prevalence and risk factors. *Neurology* 2009;73:1796–1803.
26. Lu SR, Fuh JL, Juang KD, Wang SJ. Migraine prevalence in adolescents aged 13–15: a student population-based study in Taiwan [in process citation]. *Cephalalgia* 2000;20:479–485.
27. Lundqvist C, Aaseth K, Grande RB, Benth JS, Russell MB. The severity of dependence score correlates with medication overuse in persons with secondary chronic headaches: The Akershus Study of Chronic Headache. *Pain* 2010;148:487–491.
28. Prencipe M, Casini AR, Ferretti C, et al. Prevalence of headache in an elderly population: attack frequency, disability, and use of medication. *J Neurol Neurosurg Psychiatry* 2001;70:377–381.
29. Scher AI, Lipton RB, Stewart WF, Bigal M. Patterns of medication use by chronic and episodic headache sufferers in the general population: results from the Frequent Headache Epidemiology Study. *Cephalalgia* 2010;30:321–328.
30. Wang SJ, Fuh JL, Lu SR, et al. Chronic daily headache in Chinese elderly: prevalence, risk factors, and biannual follow-up. *Neurology* 2000;54:314–319.
31. Wang SJ, Fuh JL, Lu SR, Juang KD. Outcomes and predictors of chronic daily headache in adolescents: a 2-year longitudinal study. *Neurology* 2007;68:591–596.
32. Wiendels NJ, Neven AK, Rosendaal FR, et al. Chronic frequent headache in the general population: prevalence and associated factors. *Cephalalgia* 2006;26:1434–1442.
33. Zwart JA, Dyb G, Hagen K, Svebak S, Stovner LJ, Holmen J. Analgesic overuse among subjects with headache, neck, and low-back pain. *Neurology* 2004;62:1540–1544.
34. Westergaard ML, Hansen EH, Glumer C, Olesen J, Jensen RH. Definitions of medication-overuse headache in population-based studies and their implications on prevalence estimates: a systematic review. *Cephalalgia* 2014;34:409–425.
35. Bensenor IM, Cook NR, Lee IM, Chown MJ, Hennekens CH, Buring JE. Low-dose aspirin for migraine prophylaxis in women. *Cephalalgia* 2001;21:175–183.
36. Buring JE, Peto R, Hennekens CH. Low-dose aspirin for migraine prophylaxis. *JAMA* 1990;264:1711–1713.
37. Holland S, Silberstein SD, Freitag F, Dodick DW, Argoff C, Ashman E. Evidence-based guideline update: NSAIDs and other complementary treatments for episodic migraine prevention in adults: report of the Quality Standards Subcommittee of the



- American Academy of Neurology and the American Headache Society. *Neurology* 2012;78:1346–1353.
38. Wilkinson SM, Becker WJ, Heine JA. Opiate use to control bowel motility may induce chronic daily headache in patients with migraine. *Headache* 2001;41:303–309.
  39. Bahra A, Walsh M, Menon S, Goadsby PJ. Does chronic daily headache arise de novo in association with regular use of analgesics? *Headache* 2003;43:179–190.
  40. Lance F, Parkes C, Wilkinson M. Does analgesic abuse cause headaches de novo? *Headache* 1988;28:61–62. Letter.
  41. Bowdler I, Kilian J. The association between analgesic abuse and headache: coincidental or causal? *Headache* 1988;28:494. Letter.
  42. Chiang CC, Schwedt TJ, Wang SJ, Dodick DW. Treatment of medication-overuse headache: a systematic review. *Cephalalgia* 2016;36:371–386.
  43. Grande RB, Aaseth K, Benth JS, Lundqvist C, Russell MB. Reduction in medication-overuse headache after short information: the Akershus Study of Chronic Headache. *Eur J Neurol* 2011;18:129–137.
  44. Hagen K, Albrechtsen C, Vilming ST, et al. Management of medication overuse headache: 1-year randomized multicentre open-label trial. *Cephalalgia* 2009;29:221–232.
  45. Rossi P, Faroni JV, Nappi G. Short-term effectiveness of simple advice as a withdrawal strategy in simple and complicated medication overuse headache. *Eur J Neurol* 2011;18:396–401.
  46. Zeeberg P, Olesen J, Jensen R. Probable medication-overuse headache: the effect of a 2-month drug-free period. *Neurology* 2006;66:1894–1898.
  47. Sarchielli P, Messina P, Cupini LM, et al. Sodium valproate in migraine without aura and medication overuse headache: a randomized controlled trial. *Eur Neuropsychopharmacol* 2014;24:1289–1297.
  48. Pijpers JA, Louter MA, de Bruin ME, et al. Detoxification in medication-overuse headache, a retrospective controlled follow-up study: does care by a headache nurse lead to cure? *Cephalalgia* 2016;36:122–130.
  49. Scher AI, Stewart WF, Ricci JA, Lipton RB. Factors associated with the onset and remission of chronic daily headache in a population-based study. *Pain* 2003;106:81–89.
  50. Lu SR, Fuh JL, Chen WT, Juang KD, Wang SJ. Chronic daily headache in Taipei, Taiwan: prevalence, follow-up and outcome predictors. *Cephalalgia* 2001;21:980–986.
  51. Silberstein SD, Blumenfeld AM, Cady RK, et al. OnabotulinumtoxinA for treatment of chronic migraine: PREEMPT 24-week pooled subgroup analysis of Patients who had acute headache medication overuse at baseline. *J Neurol Sci* 2013;331:48–56.
  52. Sandrini G, Perrotta A, Tassorelli C, et al. Botulinum toxin type-A in the prophylactic treatment of medication-overuse headache: a multicenter, doubleblind, randomized, placebo-controlled, parallel group study. *J Headache Pain* 2011;12:427–433.
  53. Diener HC, Agosti R, Allais G, et al. Cessation versus continuation of 6-month migraine preventive therapy with topiramate (PROMPT): a randomised, double-blind, placebo-controlled trial. *Lancet Neurol* 2007;6:1054–1062.
  54. Silvestrini M, Bartolini M, Coccia M, Baruffaldi R, Taffi R, Provinciali L. Topiramate in the treatment of chronic migraine. *Cephalalgia* 2003;23:820–824.
  55. Diener HC. Detoxification for medication overuse headache is not necessary. *Cephalalgia* 2012;32:423–427.
  56. Kempner J. What biology can't do. *Headache* 2016;56:1047–1052.
  57. Greenberg SA. Understanding belief using citation networks. *J Eval Clin Pract* 2011;17:389–393.
  58. Diener HC, Bingel U. Surgical treatment for migraine: time to fight against the knife. *Cephalalgia* 2015;35:465–468.
  59. Schurks M, Diener HC. Closure of patent foramen ovale in the prevention of migraine: not enough evidence in favor. *Nat Clin Pract Neurol* 2009;5:22–23.
  60. Tariq N, Tepper SJ, Krieger JS. Patent foramen ovale and migraine: closing the debate: a review. *Headache* 2016;56:462–478.
  61. Determining the optimal treatment strategy for Patients who have chronic migraine with medication overuse [online]. Available at: [pcori.org/research-results/2016/determining-optimal-treatment-strategy-patients-who-have-chronic-migraine](http://pcori.org/research-results/2016/determining-optimal-treatment-strategy-patients-who-have-chronic-migraine). Accessed August 1, 2017.
  62. Lipton RB, Penzien DB, Turner DP, Smitherman TA, Houle TT. Methodological issues in studying rates and predictors of migraine progression and remission. *Headache* 2013;53:930–934.
  63. Houle TT, Turner DP, Smitherman TA, Penzien DB, Lipton RB. Influence of random measurement error on estimated rates of headache chronification and remission. *Headache* 2013;53:920–929.
  64. Turner DP, Smitherman TA, Penzien DB, Lipton RB, Houle TT. Rethinking headache chronification. *Headache* 2013;53:901–907.
  65. Houle TT, Turner DP, Houle TA, et al. Rounding behavior in the reporting of headache frequency complicates headache chronification research. *Headache* 2013;53:908–919.
  66. Hagen K, Jensen R, Boe MG, Stovner LJ. Medication overuse headache: a critical review of end points in recent follow-up studies. *J Headache Pain* 2010;11:373–377.
  67. Hagen K, Stovner LJ, Zwart JA. Potentials and pitfalls in analytical headache epidemiological studies: lessons to be learned from the Head-HUNT study. *Cephalalgia* 2007;27:403–413.
